# Supplementary material for: Assessing hydrophobic deep eutectic solvents for intramolecular excimer formation
Source: Royal Society of Chemistry journal article supplement (doi:10.1039/d4cp01698j), 2024-01-01
Supplement: d4cp01698j1.pdf [file d4cp01698j1.pdf]

## **Electronic Supplementary Information (ESI)**

### **Assessing Hydrophobic Deep Eutectic Solvents for Intramolecular Excimer Formation**

Shreya Juneja and Siddharth Pandey\*

Department of Chemistry, Indian Institute of Technology Delhi, Hauz Khas, New Delhi –  
110016, India.

\*To whom correspondence should be addressed.

E-mail: sipandey@chemistry.iitd.ac.in, Phone: +91-11-26596503, Fax: +91-11-26581102

## Table of Contents

|            | Page No. |
|------------|----------|
| Table S1   | S3       |
| Table S2   | S11      |
| Figure S1  | S15      |
| Figure S2  | S16      |
| Figure S3  | S17      |
| Figure S4  | S18      |
| Figure S5  | S19      |
| Figure S6  | S20      |
| Figure S7  | S21      |
| Figure S8  | S22      |
| Figure S9  | S23      |
| Figure S10 | S24      |

**Table S1** Recovered Excited-State Intensity Decay Parameters for 1-Py(CH<sub>2</sub>)<sub>10</sub>COO(CH<sub>2</sub>)<sub>6</sub>1-Py (10 μM; Excitation with 340 nm NanoLED) Dissolved in the Investigated DESs at Different Temperatures. For T > 323.15 K, the Parameters are Obtained *via* Global Fitting Strategy. Errors Associated with Decay Times are  $\leq \pm 2\%$ .

| Temperature (K)         | $\lambda_{em}$ (nm) | $\tau_1$ (ns) ( $\alpha_1$ ) | $\tau_2$ (ns) ( $\alpha_2$ ) | $\chi^2$ |
|-------------------------|---------------------|------------------------------|------------------------------|----------|
| <b>Men : DA (2 : 1)</b> |                     |                              |                              |          |
| 293.15                  | 377                 | 45.1                         |                              | 0.92     |
|                         | 480                 | 42.1 (-0.50)                 | 42.2 (0.50)                  | 2.24     |
| 303.15                  | 377                 | 32.5                         |                              | 0.87     |
|                         | 480                 | 33.0 (-0.50)                 | 33.1 (0.50)                  | 2.11     |
| 313.15                  | 377                 | 24.5                         |                              | 0.89     |
|                         | 480                 | 26.5 (-0.50)                 | 26.5 (0.50)                  | 1.96     |
| 323.15                  | 377                 | 19.3                         |                              | 1.09     |
|                         | 480                 | 21.8 (-0.50)                 | 21.8 (0.50)                  | 1.63     |
| -----                   |                     |                              |                              |          |
| 333.15                  | 377                 | 31.6                         |                              | 14.31    |
|                         |                     | 13.4 (0.73)                  | 23.1 (0.27)                  | 0.91     |
| 343.15                  | 480                 | 13.4 (-0.48)                 | 23.1 (0.52)                  | 1.62     |
|                         | 377                 | 26.9                         |                              | 10.34    |
| 353.15                  |                     | 9.80 (0.64)                  | 21.0 (0.36)                  | 0.89     |
|                         | 480                 | 9.80 (-0.47)                 | 21.0 (0.53)                  | 1.54     |
| 363.15                  | 377                 | 22.9                         |                              | 7.33     |
|                         |                     | 7.23 (0.56)                  | 19.2 (0.44)                  | 0.98     |
| 373.15                  | 480                 | 7.23 (-0.45)                 | 19.2 (0.55)                  | 1.99     |
|                         | 377                 | 20.0                         |                              | 5.38     |
| 383.15                  |                     | 5.27 (0.50)                  | 17.7 (0.50)                  | 0.98     |
|                         | 480                 | 5.27 (-0.43)                 | 17.7 (0.57)                  | 1.67     |
| <b>Men : DA (1 : 1)</b> |                     |                              |                              |          |
| 293.15                  | 377                 | 41.7                         |                              | 0.97     |
|                         | 480                 | 39.7 (-0.50)                 | 39.8 (0.50)                  | 1.94     |
| 303.15                  | 377                 | 30.8                         |                              | 0.90     |

|                         |     |              |             |       |
|-------------------------|-----|--------------|-------------|-------|
|                         | 480 | 31.7 (-0.50) | 31.7 (0.50) | 1.68  |
| 313.15                  | 377 | 23.6         |             | 1.06  |
|                         | 480 | 25.5 (-0.50) | 25.5 (0.50) | 1.57  |
| 323.15                  | 377 | 18.8         |             | 1.11  |
|                         | 480 | 20.9 (-0.50) | 20.9 (0.50) | 1.41  |
| -----                   |     |              |             |       |
| 333.15                  | 377 | 30.6         |             | 18.09 |
|                         |     | 12.1 (0.70)  | 22.5 (0.30) | 1.02  |
|                         | 480 | 12.1 (-0.48) | 22.5 (0.52) | 1.44  |
| 343.15                  | 377 | 25.7         |             | 14.35 |
|                         |     | 9.05 (0.65)  | 20.2 (0.35) | 0.98  |
|                         | 480 | 9.05 (-0.47) | 20.2 (0.53) | 1.43  |
| 353.15                  | 377 | 22.2         |             | 10.73 |
|                         |     | 6.45 (0.59)  | 18.5 (0.41) | 1.00  |
|                         | 480 | 6.45 (-0.47) | 18.5 (0.53) | 1.37  |
| 363.15                  | 377 | 18.8         |             | 6.91  |
|                         |     | 4.83 (0.50)  | 16.6 (0.50) | 0.88  |
|                         | 480 | 4.83 (-0.45) | 16.6 (0.55) | 1.26  |
| -----                   |     |              |             |       |
| <b>Men : DA (1 : 2)</b> |     |              |             |       |
| -----                   |     |              |             |       |
| 293.15                  | 377 | 39.6         |             | 0.96  |
|                         | 480 | 38.4 (-0.50) | 38.4 (0.50) | 1.59  |
| 303.15                  | 377 | 29.7         |             | 0.97  |
|                         | 480 | 30.9 (-0.50) | 30.9 (0.50) | 1.47  |
| 313.15                  | 377 | 23.2         |             | 1.07  |
|                         | 480 | 25.3 (-0.50) | 25.3 (0.50) | 1.27  |
| 323.15                  | 377 | 19.1         |             | 1.17  |
|                         | 480 | 21.0 (-0.50) | 21.0 (0.50) | 1.26  |
| -----                   |     |              |             |       |
| 333.15                  | 377 | 29.9         |             | 15.83 |
|                         |     | 12.6 (0.67)  | 21.8 (0.33) | 1.05  |
|                         | 480 | 12.6 (-0.49) | 21.8 (0.51) | 1.59  |
| 343.15                  | 377 | 25.8         |             | 11.92 |

|                         |     |              |             |       |
|-------------------------|-----|--------------|-------------|-------|
|                         |     | 9.08 (0.61)  | 20.1 (0.39) | 1.01  |
|                         | 480 | 9.08 (-0.48) | 20.1 (0.52) | 1.71  |
| 353.15                  | 377 | 22.0         |             | 9.36  |
|                         |     | 6.58 (0.55)  | 18.3 (0.45) | 1.01  |
|                         | 480 | 6.58 (-0.47) | 18.3 (0.53) | 1.72  |
| 363.15                  | 377 | 19.2         |             | 6.77  |
|                         |     | 4.83 (0.48)  | 16.6 (0.52) | 1.04  |
|                         | 480 | 4.83 (-0.46) | 16.6 (0.54) | 1.71  |
| <b>Thy : DA (2 : 1)</b> |     |              |             |       |
| 293.15                  | 377 | 40.3         |             | 0.93  |
|                         | 480 | 38.3 (-0.50) | 38.8 (0.50) | 1.13  |
| 303.15                  | 377 | 29.6         |             | 0.92  |
|                         | 480 | 30.2 (-0.50) | 30.9 (0.50) | 1.19  |
| 313.15                  | 377 | 22.3         |             | 0.89  |
|                         | 480 | 24.5 (-0.50) | 24.5 (0.50) | 1.35  |
| 323.15                  | 377 | 18.0         |             | 0.94  |
|                         | 480 | 20.4 (-0.50) | 20.4 (0.50) | 1.40  |
| -----                   |     |              |             |       |
| 333.15                  | 377 | 29.6         |             | 16.93 |
|                         |     | 12.0 (0.75)  | 22.0 (0.25) | 0.86  |
|                         | 480 | 12.0 (-0.49) | 22.0 (0.51) | 1.41  |
| 343.15                  | 377 | 25.9         |             | 12.89 |
|                         |     | 9.09 (0.69)  | 20.2 (0.31) | 0.89  |
|                         | 480 | 9.09 (-0.48) | 20.2 (0.52) | 1.38  |
| 353.15                  | 377 | 22.5         |             | 10.72 |
|                         |     | 6.63 (0.62)  | 18.6 (0.38) | 0.91  |
|                         | 480 | 6.63 (-0.48) | 18.6 (0.52) | 1.53  |
| 363.15                  | 377 | 20.2         |             | 7.03  |
|                         |     | 4.92 (0.54)  | 17.5 (0.46) | 0.93  |
|                         | 480 | 4.92 (-0.47) | 17.5 (0.53) | 1.43  |
| <b>Thy : DA (1 : 1)</b> |     |              |             |       |

|                         |     |               |              |       |
|-------------------------|-----|---------------|--------------|-------|
| 293.15                  | 377 | 39.5          |              | 1.01  |
|                         | 480 | 37.7 (-0.50)  | 37.9 (0.50)  | 1.53  |
| 303.15                  | 377 | 29.4          |              | 0.95  |
|                         | 480 | 30.4 (-0.50)  | 30.4 (0.50)  | 1.49  |
| 313.15                  | 377 | 22.8          |              | 0.93  |
|                         | 480 | 24.9 (0.50)   | 24.9 (-0.50) | 1.53  |
| 323.15                  | 377 | 18.5          |              | 1.21  |
|                         | 480 | 20.7 (-0.50)  | 20.7 (0.50)  | 1.54  |
| -----                   |     |               |              |       |
| 333.15                  | 377 | 30.2          |              | 21.93 |
|                         |     | 12.5 (0.72)   | 22.4 (0.28)  | 0.99  |
|                         | 480 | 12.5 (-0.49)  | 22.4 (0.51)  | 1.48  |
| 343.15                  | 377 | 25.7          |              | 17.84 |
|                         |     | 9.17 (0.65)   | 20.2 (0.35)  | 1.13  |
|                         | 480 | 9.17 (-0.48)  | 20.2 (0.52)  | 2.05  |
| 353.15                  | 377 | 22.1          |              | 11.96 |
|                         |     | 6.74 (0.58)   | 18.3 (0.42)  | 1.13  |
|                         | 480 | 6.74 (-0.47)  | 18.3 (0.53)  | 1.94  |
| 363.15                  | 377 | 19.3          |              | 8.65  |
|                         |     | 4.98 (0.51)   | 16.7 (0.49)  | 1.00  |
|                         | 480 | 4.98 (-0.47)  | 16.7 (0.53)  | 1.82  |
| <hr/>                   |     |               |              |       |
| <b>Thy : DA (1 : 2)</b> |     |               |              |       |
| <hr/>                   |     |               |              |       |
| 293.15                  | 377 | 37.8          |              | 0.88  |
|                         | 480 | 36.9 (-0.50)  | 36.9 (0.50)  | 1.31  |
| 303.15                  | 377 | 28.6          |              | 0.85  |
|                         | 480 | 29.80 (-0.50) | 29.85 (0.50) | 1.29  |
| 313.15                  | 377 | 22.3          |              | 0.85  |
|                         | 480 | 24.5 (0.50)   | 24.4 (-0.50) | 1.38  |
| 323.15                  | 377 | 18.3          |              | 1.16  |
|                         | 480 | 20.4 (-0.50)  | 20.4 (0.50)  | 1.34  |
| -----                   |     |               |              |       |
| 333.15                  | 377 | 30.1          |              | 18.35 |

|        |     |              |             |       |
|--------|-----|--------------|-------------|-------|
|        |     | 12.4 (0.71)  | 22.1 (0.29) | 0.92  |
|        | 480 | 12.4 (-0.49) | 22.1 (0.51) | 1.34  |
| 343.15 | 377 | 25.9         |             | 13.41 |
|        |     | 9.09 (-0.48) | 20.3 (0.52) | 0.88  |
|        | 480 | 9.09 (-0.48) | 20.3 (0.52) | 1.50  |
| 353.15 | 377 | 22.1         |             | 9.62  |
|        |     | 6.76 (0.57)  | 18.3 (0.43) | 0.84  |
|        | 480 | 6.76 (-0.48) | 18.3 (0.52) | 1.57  |
| 363.15 | 377 | 18.9         |             | 6.82  |
|        |     | 4.96 (0.49)  | 16.4 (0.51) | 0.91  |
|        | 480 | 4.96 (-0.47) | 16.4 (0.53) | 1.57  |

---

**Thy : Men (5 : 1)**

---

|        |     |              |              |      |
|--------|-----|--------------|--------------|------|
| 293.15 | 377 | 45.7         |              | 1.07 |
|        | 480 | 42.1 (-0.50) | 42.1 (0.50)  | 1.46 |
| 303.15 | 377 | 32.9         |              | 0.92 |
|        | 480 | 33.0 (-0.50) | 33.0 (0.50)  | 1.55 |
| 313.15 | 377 | 24.3         |              | 1.04 |
|        | 480 | 26.4 (0.50)  | 26.3 (-0.50) | 1.32 |
| 323.15 | 377 | 19.0         |              | 1.03 |
|        | 480 | 21.6 (-0.50) | 21.6 (0.50)  | 1.58 |

---

|        |     |              |             |       |
|--------|-----|--------------|-------------|-------|
| 333.15 | 377 | 31.3         |             | 20.48 |
|        |     | 13.6 (0.79)  | 22.6 (0.21) | 0.83  |
|        | 480 | 13.6 (-0.49) | 22.6 (0.51) | 1.20  |
| 343.15 | 377 | 26.2         |             | 18.71 |
|        |     | 9.74 (0.70)  | 20.4 (0.30) | 0.89  |
|        | 480 | 9.74 (-0.48) | 20.4 (0.52) | 1.37  |
| 353.15 | 377 | 22.3         |             | 13.21 |
|        |     | 7.18 (0.65)  | 18.2 (0.35) | 1.00  |
|        | 480 | 7.18 (-0.48) | 18.2 (0.52) | 1.33  |
| 363.15 | 377 | 19.2         |             | 9.66  |
|        |     | 5.23 (0.57)  | 16.5 (0.43) | 0.91  |
|        | 480 | 5.23 (-0.47) | 16.5 (0.53) | 1.57  |

| <b>Thy : Men (2 : 1)</b> |     |              |              |       |
|--------------------------|-----|--------------|--------------|-------|
| 293.15                   | 377 | 53.0         |              | 0.87  |
|                          | 480 | 46.9 (-0.50) | 46.9 (0.50)  | 1.22  |
| 303.15                   | 377 | 37.2         |              | 0.93  |
|                          | 480 | 36.3 (-0.50) | 36.3 (0.50)  | 1.24  |
| 313.15                   | 377 | 27.4         |              | 0.82  |
|                          | 480 | 28.7 (0.50)  | 28.7 (-0.50) | 1.33  |
| 323.15                   | 377 | 21.0         |              | 0.81  |
|                          | 480 | 23.3 (-0.50) | 23.4 (0.50)  | 1.43  |
| -----                    |     |              |              |       |
| 333.15                   | 377 | 32.9         |              | 19.81 |
|                          |     | 15.5 (0.82)  | 22.7 (0.18)  | 0.89  |
| 343.15                   | 480 | 15.5 (-0.49) | 22.7 (0.51)  | 1.20  |
|                          | 377 | 25.9         |              | 15.82 |
| 353.15                   | 480 | 10.8 (0.69)  | 20.7 (0.31)  | 0.84  |
|                          | 377 | 10.8 (-0.48) | 20.7 (0.52)  | 1.41  |
| 363.15                   | 480 | 23.2         |              | 12.41 |
|                          | 377 | 7.82 (0.63)  | 18.7 (0.37)  | 0.85  |
| 373.15                   | 480 | 7.82 (-0.48) | 18.7 (0.52)  | 1.75  |
|                          | 377 | 20.0         |              | 8.72  |
| 383.15                   | 480 | 5.54 (0.56)  | 17.1 (0.44)  | 0.83  |
|                          | 377 | 5.54 (-0.47) | 17.1 (0.53)  | 1.58  |
| <b>Thy : Men (1 : 1)</b> |     |              |              |       |
| 293.15                   | 377 | 58.0         |              | 0.95  |
|                          | 480 | 45.7 (-0.49) | 54.3 (0.51)  | 1.48  |
| 303.15                   | 377 | 40.3         |              | 0.97  |
|                          | 480 | 38.3 (-0.50) | 38.3 (0.50)  | 1.30  |
| 313.15                   | 377 | 28.9         |              | 0.90  |
|                          | 480 | 30.0 (0.50)  | 30.0 (-0.50) | 1.43  |
| 323.15                   | 377 | 22.0         |              | 0.95  |
|                          | 480 | 24.0 (-0.50) | 24.1 (0.50)  | 1.22  |



|                          |     |              |              |       |
|--------------------------|-----|--------------|--------------|-------|
| 333.15                   | 377 | 33.5         |              | 24.14 |
|                          |     | 15.4 (0.79)  | 23.7 (0.21)  | 1.03  |
|                          | 480 | 15.4 (-0.49) | 23.7 (0.51)  | 1.47  |
| 343.15                   | 377 | 28.0         |              | 18.87 |
|                          |     | 10.6 (0.71)  | 21.6 (0.29)  | 0.92  |
|                          | 480 | 10.6 (-0.48) | 21.6 (0.52)  | 1.39  |
| 353.15                   | 377 | 23.6         |              | 14.09 |
|                          |     | 7.59 (0.63)  | 19.0 (0.37)  | 1.00  |
|                          | 480 | 7.59 (-0.48) | 19.0 (0.52)  | 1.59  |
| 363.15                   | 377 | 20.1         |              | 11.18 |
|                          |     | 5.41 (0.57)  | 17.3 (0.43)  | 1.09  |
|                          | 480 | 5.41 (-0.47) | 17.3 (0.53)  | 1.27  |
| <b>Thy : Men (1 : 2)</b> |     |              |              |       |
| 293.15                   | 377 | 60.1         |              | 0.91  |
|                          | 480 | 43.5 (-0.48) | 58.3 (0.52)  | 1.25  |
| 303.15                   | 377 | 40.7         |              | 0.79  |
|                          | 480 | 38.7 (-0.50) | 38.7 (0.50)  | 1.17  |
| 313.15                   | 377 | 28.9         |              | 0.98  |
|                          | 480 | 30.1 (0.50)  | 29.3 (-0.50) | 1.48  |
| 323.15                   | 377 | 21.6         |              | 0.86  |
|                          | 480 | 23.6 (-0.50) | 23.6 (0.50)  | 1.68  |
| 333.15                   | 377 | 33.5         |              | 22.00 |
|                          |     | 15.5 (0.79)  | 22.8 (0.21)  | 0.83  |
|                          | 480 | 15.5 (-0.49) | 22.8 (0.51)  | 1.23  |
| 343.15                   | 377 | 27.4         |              | 15.56 |
|                          |     | 10.5 (0.68)  | 20.8 (0.32)  | 0.79  |
|                          | 480 | 10.5 (-0.48) | 20.8 (0.52)  | 1.26  |
| 353.15                   | 377 | 23.1         |              | 11.38 |
|                          |     | 7.49 (0.61)  | 18.8 (0.39)  | 0.95  |
|                          | 480 | 7.49 (-0.48) | 18.8 (0.52)  | 1.77  |

|                          |     |              |             |       |
|--------------------------|-----|--------------|-------------|-------|
| 363.15                   | 377 | 20.0         |             | 9.04  |
|                          |     | 5.41 (0.55)  | 17.0 (0.45) | 0.87  |
|                          | 480 | 5.41 (-0.47) | 17.0 (0.53) | 1.53  |
| <b>Thy : Men (1 : 5)</b> |     |              |             |       |
| 293.15                   | 377 | 61.3         |             | 0.86  |
|                          | 480 | 37.8 (-0.47) | 63.8 (0.53) | 1.16  |
| 303.15                   | 377 | 40.7         |             | 0.83  |
|                          | 480 | 38.2 (-0.50) | 38.3 (0.50) | 1.06  |
| 313.15                   | 377 | 28.2         |             | 0.89  |
|                          | 480 | 29.1 (-0.50) | 29.2 (0.50) | 1.12  |
| 323.15                   | 377 | 20.8         |             | 0.96  |
|                          | 480 | 22.8 (-0.50) | 23.1 (0.50) | 1.09  |
| -----                    |     |              |             |       |
| 333.15                   | 377 | 32.3         |             | 18.94 |
|                          |     | 13.6 (0.74)  | 23.7 (0.26) | 0.89  |
|                          | 480 | 13.6 (-0.49) | 23.7 (0.51) | 1.56  |
| 343.15                   | 377 | 27.1         |             | 15.47 |
|                          |     | 9.45 (0.69)  | 21.5 (0.32) | 0.90  |
|                          | 480 | 9.45 (-0.48) | 21.5 (0.52) | 1.67  |
| 353.15                   | 377 | 22.9         |             | 10.76 |
|                          |     | 6.84 (0.63)  | 19.0 (0.37) | 0.83  |
|                          | 480 | 6.84 (-0.48) | 19.0 (0.52) | 1.61  |
| 363.15                   | 377 | 19.5         |             | 8.19  |
|                          |     | 4.70 (0.57)  | 17.1 (0.43) | 0.87  |
|                          | 480 | 4.70 (-0.47) | 17.1 (0.53) | 1.47  |

**Table S2** Recovered values for the rate constants of intramolecular excimer formation ( $k_a$ ) and dissociation ( $k_d$ ), excimer deactivation ( $k_E$ ) and monomer deactivation ( $k_M$ ) along with equilibrium constant for excimer formation ( $K_{eq,a}^*$ ) for 1-Py(CH<sub>2</sub>)<sub>10</sub>COO(CH<sub>2</sub>)<sub>6</sub>1-Py dissolved in the investigated DESs in the temperature range 293.15 K–363.15 K.

| T/K                                  | $\eta$ (mPa.s) <sup>a</sup> | $k_a$       | $k_d$       | $k_E$      | $k_M$      | $K_{eq,a}^* = k_a/k_d$ |
|--------------------------------------|-----------------------------|-------------|-------------|------------|------------|------------------------|
| (10 <sup>6</sup> , s <sup>-1</sup> ) |                             |             |             |            |            |                        |
| <b>Men : DA (2:1)</b>                |                             |             |             |            |            |                        |
| 293.15                               | 28.33                       | 8.34 ± 0.16 | neg         | 23.8 ± 0.2 | 13.8 ± 0.2 | nd                     |
| 303.15                               | 16.22                       | 13.8 ± 0.2  | neg         | 30.3 ± 0.3 | 17.0 ± 0.2 | nd                     |
| 313.15                               | 10.10                       | 20.6 ± 0.3  | neg         | 37.7 ± 0.4 | 20.2 ± 0.2 | nd                     |
| 323.15                               | 6.73                        | 27.6 ± 0.4  | neg         | 45.9 ± 0.5 | 24.1 ± 0.3 | nd                     |
| 333.15                               | 4.74                        | 37.7 ± 0.5  | 5.09 ± 0.13 | 46.7 ± 0.5 | 28.5 ± 0.3 | 7.4 ± 0.3              |
| 343.15                               | 3.56                        | 48.6 ± 0.7  | 14.0 ± 0.2  | 53.2 ± 0.6 | 33.9 ± 0.4 | 3.5 ± 0.2              |
| 353.15                               | 2.71                        | 61.5 ± 0.9  | 29.7 ± 0.4  | 60.4 ± 0.6 | 38.9 ± 0.4 | 2.1 ± 0.1              |
| 363.15                               | 2.13                        | 76.3 ± 1.5  | 58.1 ± 0.9  | 65.1 ± 0.7 | 46.8 ± 0.4 | 1.3 ± 0.1              |
| <b>Men : DA (1:1)</b>                |                             |             |             |            |            |                        |
| 293.15                               | 20.41                       | 7.99 ± 0.13 | neg         | 25.2 ± 0.2 | 16.0 ± 0.2 | nd                     |
| 303.15                               | 12.81                       | 13.1 ± 0.2  | neg         | 31.5 ± 0.2 | 19.3 ± 0.2 | nd                     |
| 313.15                               | 8.54                        | 19.8 ± 0.4  | neg         | 39.2 ± 0.3 | 22.7 ± 0.2 | nd                     |
| 323.15                               | 6.00                        | 27.2 ± 0.6  | neg         | 47.9 ± 0.4 | 26.6 ± 0.3 | nd                     |
| 333.15                               | 4.41                        | 40.3 ± 0.9  | 7.56 ± 0.14 | 48.3 ± 0.4 | 30.8 ± 0.3 | 5.3 ± 0.2              |
| 343.15                               | 3.47                        | 52.9 ± 1.1  | 15.9 ± 0.2  | 54.9 ± 0.5 | 36.2 ± 0.4 | 3.3 ± 0.2              |
| 353.15                               | 2.70                        | 71.8 ± 1.3  | 34.4 ± 0.3  | 61.0 ± 0.7 | 41.8 ± 0.4 | 2.1 ± 0.1              |
| 363.15                               | 2.18                        | 85.2 ± 1.6  | 63.1 ± 1.0  | 70.6 ± 0.8 | 48.4 ± 0.5 | 1.4 ± 0.1              |
| <b>Men : DA (1:2)</b>                |                             |             |             |            |            |                        |
| 293.15                               | 16.01                       | 8.77 ± 0.15 | neg         | 26.0 ± 0.3 | 16.5 ± 0.2 | nd                     |
| 303.15                               | 10.47                       | 14.0 ± 0.2  | neg         | 32.4 ± 0.3 | 19.7 ± 0.2 | nd                     |
| 313.15                               | 7.45                        | 19.9 ± 0.3  | neg         | 39.6 ± 0.4 | 23.2 ± 0.2 | nd                     |
| 323.15                               | 5.45                        | 25.4 ± 0.4  | neg         | 47.6 ± 0.5 | 27.0 ± 0.3 | nd                     |
| 333.15                               | 4.14                        | 36.9 ± 0.6  | 6.67 ± 0.15 | 50.2 ± 0.5 | 31.4 ± 0.3 | 5.5 ± 0.3              |
| 343.15                               | 3.24                        | 50.6 ± 0.8  | 17.2 ± 0.3  | 56.1 ± 0.6 | 36.0 ± 0.4 | 3.0 ± 0.2              |
| 353.15                               | 2.68                        | 66.9 ± 1.0  | 35.0 ± 0.5  | 63.5 ± 0.7 | 41.3 ± 0.4 | 1.9 ± 0.1              |

|        |      |            |            |            |            |           |
|--------|------|------------|------------|------------|------------|-----------|
| 363.15 | 2.24 | 83.4 ± 1.6 | 64.4 ± 1.0 | 72.2 ± 0.8 | 47.4 ± 0.5 | 1.3 ± 0.1 |
|--------|------|------------|------------|------------|------------|-----------|

---

**Thy : DA (2:1)**

---

|        |       |            |             |            |            |           |
|--------|-------|------------|-------------|------------|------------|-----------|
| 293.15 | 16.54 | 10.1 ± 0.2 | neg         | 26.1 ± 0.2 | 14.7 ± 0.2 | nd        |
| 303.15 | 10.00 | 16.3 ± 0.3 | neg         | 33.1 ± 0.3 | 17.5 ± 0.2 | nd        |
| 313.15 | 6.89  | 24.4 ± 0.4 | neg         | 40.8 ± 0.4 | 20.3 ± 0.2 | nd        |
| 323.15 | 4.86  | 31.3 ± 0.5 | neg         | 49.1 ± 0.4 | 24.0 ± 0.2 | nd        |
| 333.15 | 3.60  | 46.0 ± 0.6 | 5.88 ± 0.16 | 49.0 ± 0.5 | 27.9 ± 0.3 | 7.8 ± 0.3 |
| 343.15 | 2.94  | 58.7 ± 0.8 | 13.3 ± 0.2  | 54.9 ± 0.6 | 32.5 ± 0.3 | 4.4 ± 0.2 |
| 353.15 | 2.13  | 76.5 ± 1.3 | 29.0 ± 0.3  | 61.5 ± 0.6 | 37.4 ± 0.4 | 2.6 ± 0.1 |
| 363.15 | 1.73  | 93.1 ± 1.8 | 56.8 ± 0.7  | 67.6 ± 0.7 | 43.0 ± 0.4 | 1.6 ± 0.1 |

---

**Thy : DA (1:1)**

---

|        |       |             |             |            |            |           |
|--------|-------|-------------|-------------|------------|------------|-----------|
| 293.15 | 15.08 | 9.09 ± 0.13 | neg         | 26.5 ± 0.3 | 16.2 ± 0.2 | nd        |
| 303.15 | 9.72  | 14.8 ± 0.2  | neg         | 32.9 ± 0.3 | 19.2 ± 0.2 | nd        |
| 313.15 | 6.93  | 21.4 ± 0.3  | neg         | 40.2 ± 0.4 | 22.3 ± 0.2 | nd        |
| 323.15 | 5.03  | 28.1 ± 0.4  | neg         | 48.3 ± 0.5 | 25.9 ± 0.3 | nd        |
| 333.15 | 3.80  | 40.2 ± 0.6  | 6.15 ± 0.16 | 48.4 ± 0.5 | 29.7 ± 0.3 | 6.5 ± 0.3 |
| 343.15 | 2.96  | 53.8 ± 0.9  | 15.0 ± 0.2  | 55.4 ± 0.5 | 34.4 ± 0.4 | 3.6 ± 0.2 |
| 353.15 | 2.38  | 70.6 ± 1.3  | 30.3 ± 0.3  | 63.7 ± 0.6 | 38.4 ± 0.4 | 2.3 ± 0.1 |
| 363.15 | 1.95  | 87.8 ± 1.8  | 56.5 ± 0.6  | 72.5 ± 0.7 | 44.0 ± 0.5 | 1.6 ± 0.1 |

---

**Thy : DA (1:2)**

---

|        |       |             |             |            |            |           |
|--------|-------|-------------|-------------|------------|------------|-----------|
| 293.15 | 13.69 | 9.79 ± 0.15 | neg         | 27.1 ± 0.3 | 16.7 ± 0.2 | nd        |
| 303.15 | 9.34  | 15.0 ± 0.2  | neg         | 33.6 ± 0.3 | 20.0 ± 0.2 | nd        |
| 313.15 | 6.64  | 21.2 ± 0.2  | neg         | 40.9 ± 0.4 | 23.7 ± 0.2 | nd        |
| 323.15 | 4.94  | 27.2 ± 0.3  | neg         | 49.0 ± 0.5 | 27.4 ± 0.3 | nd        |
| 333.15 | 3.80  | 38.4 ± 0.4  | 6.70 ± 0.17 | 48.7 ± 0.5 | 31.8 ± 0.3 | 5.7 ± 0.3 |
| 343.15 | 3.01  | 52.2 ± 0.8  | 16.3 ± 0.2  | 54.7 ± 0.6 | 35.8 ± 0.4 | 3.2 ± 0.2 |
| 353.15 | 2.49  | 66.8 ± 1.2  | 32.0 ± 0.3  | 62.7 ± 0.7 | 40.9 ± 0.4 | 2.1 ± 0.1 |
| 363.15 | 2.06  | 85.2 ± 1.7  | 58.0 ± 0.6  | 74.7 ± 0.8 | 44.6 ± 0.4 | 1.5 ± 0.1 |

---

**Thy : Men (5:1)**

---

|        |       |             |     |            |            |    |
|--------|-------|-------------|-----|------------|------------|----|
| 293.15 | 29.35 | 9.87 ± 0.18 | neg | 23.8 ± 0.3 | 12.0 ± 0.2 | nd |
| 303.15 | 14.58 | 16.5 ± 0.3  | neg | 30.4 ± 0.4 | 13.9 ± 0.2 | nd |

|        |      |            |             |            |            |            |
|--------|------|------------|-------------|------------|------------|------------|
| 313.15 | 8.50 | 25.0 ± 0.3 | neg         | 37.9 ± 0.4 | 16.1 ± 0.2 | nd         |
| 323.15 | 5.41 | 34.2 ± 0.4 | neg         | 46.4 ± 0.5 | 18.4 ± 0.2 | nd         |
| 333.15 | 3.71 | 47.6 ± 0.6 | 2.98 ± 0.14 | 47.4 ± 0.5 | 19.8 ± 0.2 | 16.0 ± 0.5 |
| 343.15 | 2.70 | 64.6 ± 1.0 | 9.34 ± 0.22 | 55.8 ± 0.6 | 21.9 ± 0.2 | 6.9 ± 0.4  |
| 353.15 | 2.05 | 84.0 ± 1.4 | 19.3 ± 0.3  | 65.1 ± 0.7 | 25.7 ± 0.3 | 4.4 ± 0.3  |
| 363.15 | 1.61 | 103 ± 2    | 40.5 ± 0.5  | 76.3 ± 0.9 | 31.8 ± 0.4 | 2.6 ± 0.2  |

---

**Thy : Men (2:1)**

---

|        |       |             |             |            |            |            |
|--------|-------|-------------|-------------|------------|------------|------------|
| 293.15 | 40.60 | 3.53 ± 0.06 | neg         | 21.3 ± 0.3 | 15.4 ± 0.3 | nd         |
| 303.15 | 19.20 | 7.99 ± 0.25 | neg         | 27.6 ± 0.3 | 18.9 ± 0.3 | nd         |
| 313.15 | 10.58 | 14.0 ± 0.3  | neg         | 34.8 ± 0.4 | 22.6 ± 0.3 | nd         |
| 323.15 | 6.50  | 21.0 ± 0.4  | neg         | 42.8 ± 0.4 | 26.6 ± 0.3 | nd         |
| 333.15 | 4.33  | 30.2 ± 0.6  | 2.05 ± 0.12 | 45.6 ± 0.5 | 30.6 ± 0.4 | 14.7 ± 0.5 |
| 343.15 | 3.08  | 43.8 ± 0.8  | 9.52 ± 0.24 | 52.4 ± 0.6 | 34.8 ± 0.4 | 4.6 ± 0.3  |
| 353.15 | 2.29  | 61.5 ± 1.3  | 21.0 ± 0.3  | 60.0 ± 0.7 | 38.9 ± 0.4 | 2.9 ± 0.2  |
| 363.15 | 1.77  | 83.8 ± 1.7  | 43.8 ± 0.5  | 68.4 ± 0.8 | 42.9 ± 0.4 | 1.9 ± 0.2  |

---

**Thy : Men (1:1)**

---

|        |       |             |             |            |            |            |
|--------|-------|-------------|-------------|------------|------------|------------|
| 293.15 | 54.98 | 3.00 ± 0.05 | neg         | 21.9 ± 0.2 | 14.2 ± 0.2 | nd         |
| 303.15 | 24.52 | 7.26 ± 0.12 | neg         | 26.1 ± 0.2 | 17.5 ± 0.2 | nd         |
| 313.15 | 12.94 | 13.6 ± 0.2  | neg         | 33.4 ± 0.3 | 21.0 ± 0.2 | nd         |
| 323.15 | 7.68  | 19.9 ± 0.3  | neg         | 41.6 ± 0.4 | 25.5 ± 0.3 | nd         |
| 333.15 | 4.95  | 30.7 ± 0.5  | 2.78 ± 0.15 | 44.2 ± 0.5 | 29.4 ± 0.3 | 11.0 ± 0.4 |
| 343.15 | 3.60  | 45.3 ± 0.7  | 10.3 ± 0.2  | 49.9 ± 0.5 | 34.9 ± 0.3 | 4.4 ± 0.3  |
| 353.15 | 2.65  | 63.8 ± 1.2  | 23.0 ± 0.3  | 58.9 ± 0.6 | 38.6 ± 0.4 | 2.8 ± 0.2  |
| 363.15 | 2.03  | 85.8 ± 1.8  | 46.1 ± 0.5  | 66.3 ± 0.7 | 44.4 ± 0.4 | 1.9 ± 0.2  |

---

**Thy : Men (1:2)**

---

|        |       |             |             |            |            |            |
|--------|-------|-------------|-------------|------------|------------|------------|
| 293.15 | 64.93 | 3.47 ± 0.06 | neg         | 23.0 ± 0.3 | 13.2 ± 0.2 | nd         |
| 303.15 | 28.45 | 8.17 ± 0.13 | neg         | 25.9 ± 0.3 | 16.4 ± 0.2 | nd         |
| 313.15 | 14.54 | 14.7 ± 0.2  | neg         | 34.1 ± 0.4 | 19.9 ± 0.2 | nd         |
| 323.15 | 8.40  | 22.3 ± 0.3  | neg         | 42.4 ± 0.4 | 24.0 ± 0.3 | nd         |
| 333.15 | 5.29  | 31.5 ± 0.5  | 2.22 ± 0.14 | 45.8 ± 0.5 | 28.5 ± 0.3 | 14.1 ± 0.4 |
| 343.15 | 3.59  | 46.1 ± 0.6  | 10.4 ± 0.2  | 52.6 ± 0.6 | 33.8 ± 0.4 | 4.4 ± 0.3  |
| 353.15 | 2.59  | 62.6 ± 0.9  | 24.4 ± 0.3  | 60.1 ± 0.7 | 39.6 ± 0.4 | 2.6 ± 0.2  |

|                        |       |             |             |            |            |           |
|------------------------|-------|-------------|-------------|------------|------------|-----------|
| 363.15                 | 2.00  | 83.7 ± 1.7  | 47.0 ± 0.5  | 68.5 ± 0.8 | 44.5 ± 0.4 | 1.8 ± 0.2 |
| <b>Thy : Men (1:5)</b> |       |             |             |            |            |           |
| 293.15                 | 88.55 | 3.52 ± 0.06 | neg         | 26.5 ± 0.3 | 12.8 ± 0.1 | nd        |
| 303.15                 | 34.38 | 8.42 ± 0.14 | neg         | 26.2 ± 0.3 | 16.1 ± 0.2 | nd        |
| 313.15                 | 16.70 | 15.2 ± 0.2  | neg         | 34.3 ± 0.4 | 20.2 ± 0.2 | nd        |
| 323.15                 | 9.25  | 23.5 ± 0.4  | neg         | 43.8 ± 0.5 | 24.5 ± 0.3 | nd        |
| 333.15                 | 5.65  | 35.5 ± 0.5  | 5.31 ± 0.24 | 44.9 ± 0.5 | 29.8 ± 0.3 | 6.7 ± 0.3 |
| 343.15                 | 3.73  | 51.5 ± 0.7  | 14.8 ± 0.3  | 50.5 ± 0.6 | 35.5 ± 0.4 | 3.5 ± 0.3 |
| 353.15                 | 2.63  | 70.6 ± 1.4  | 29.0 ± 0.4  | 58.2 ± 0.7 | 40.9 ± 0.4 | 2.4 ± 0.2 |
| 363.15                 | 2.04  | 101 ± 2     | 57.5 ± 0.7  | 67.4 ± 0.8 | 45.2 ± 0.5 | 1.8 ± 0.2 |

<sup>a</sup>Reference 39  
neg: negligible  
nd: not defined

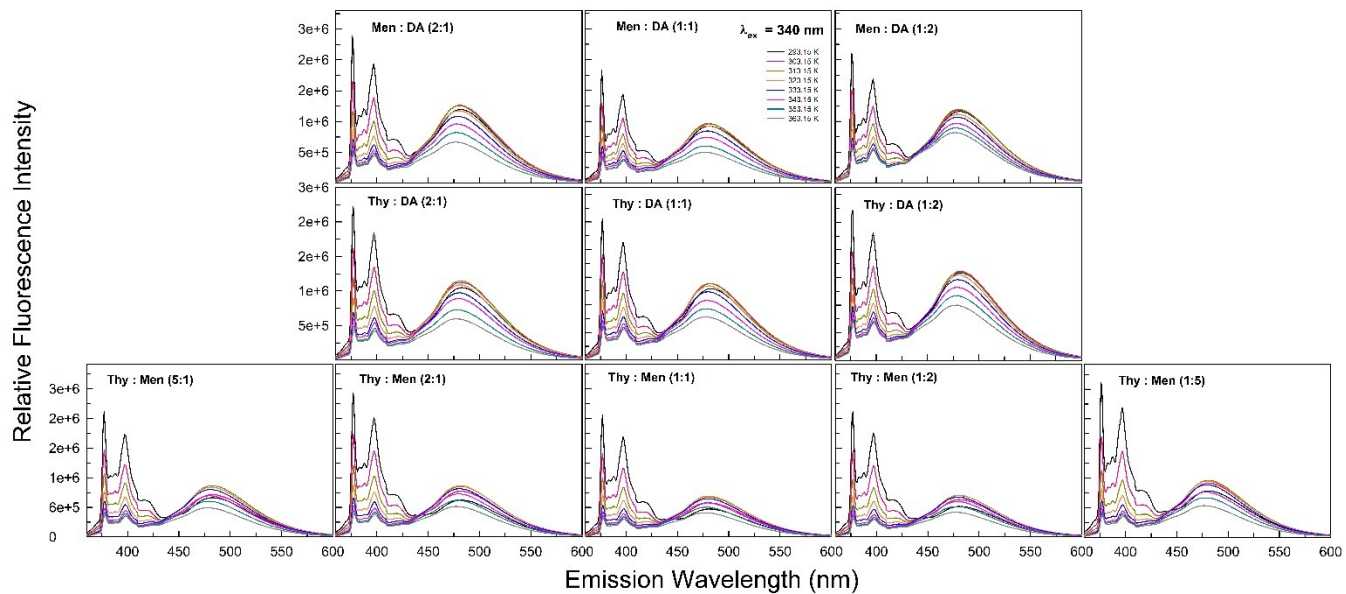

**Figure S1.** Relative steady-state fluorescence emission spectra [ $\lambda_{ex} = 340 \text{ nm}$  (Xe arc lamp); excitation and emission slits are 1 and 1 nm, respectively] of 1-Py(CH<sub>2</sub>)<sub>10</sub>COO(CH<sub>2</sub>)<sub>6</sub>1-Py (10  $\mu\text{M}$ ) dissolved in the investigated DESs at different temperatures.

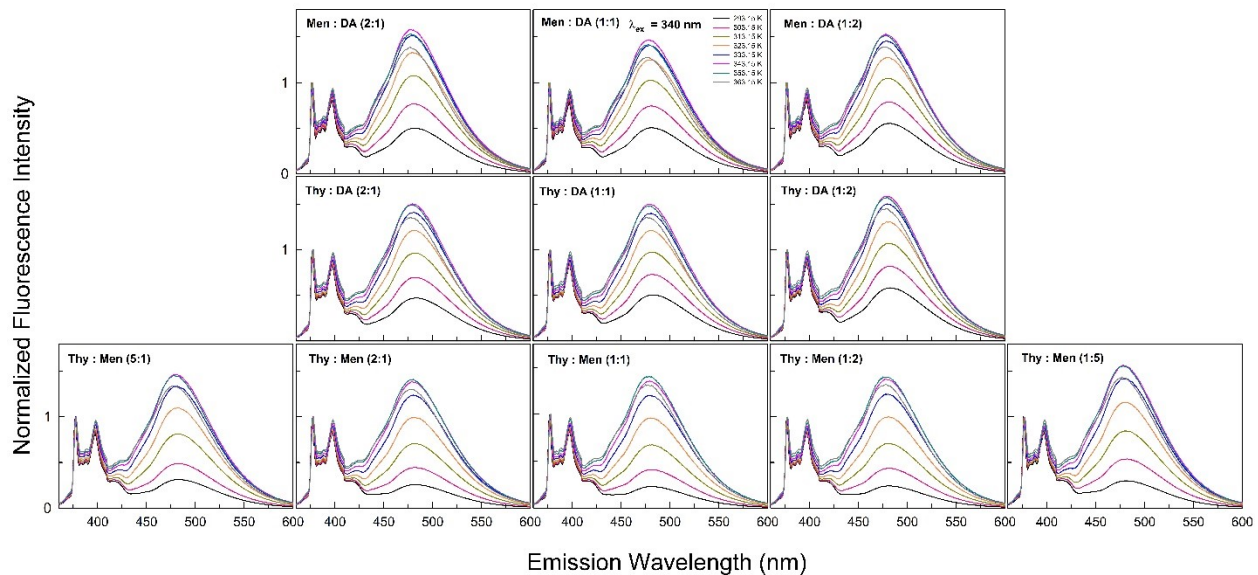

**Figure S2.** Normalized steady-state fluorescence emission spectra [ $\lambda_{\text{ex}} = 340 \text{ nm}$  (Xe arc lamp); excitation and emission slits are 1 and 1 nm, respectively] of 1-Py(CH<sub>2</sub>)<sub>10</sub>COO(CH<sub>2</sub>)<sub>6</sub>1-Py (10  $\mu\text{M}$ ) dissolved in the investigated DESs at different temperatures.



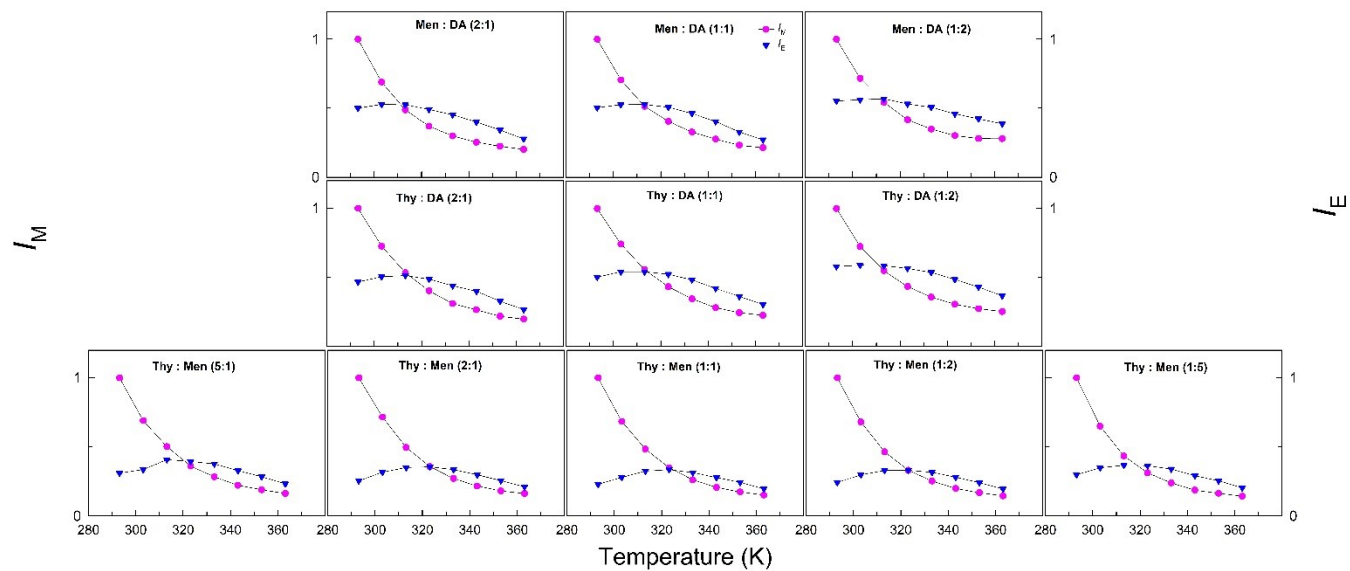

**Figure S3.** Variation of  $I_M$  (at 377 nm) and  $I_E$  (at 480 nm) with temperature (K) for 1-Py(CH<sub>2</sub>)<sub>10</sub>COO(CH<sub>2</sub>)<sub>6</sub>1-Py (10 μM) dissolved in the investigated DESs.

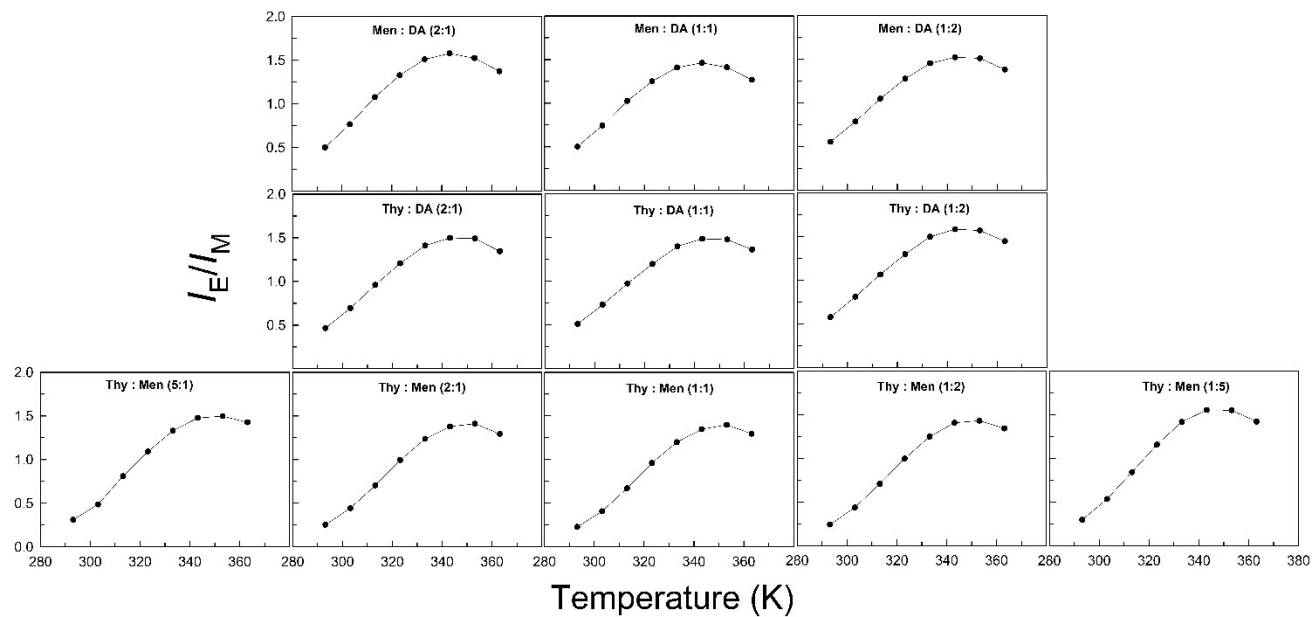

**Figure S4.** Variation of  $I_E/I_M$  with temperature (K) for 1-Py(CH<sub>2</sub>)<sub>10</sub>COO(CH<sub>2</sub>)<sub>6</sub>1-Py (10 μM) dissolved in the investigated DESs.

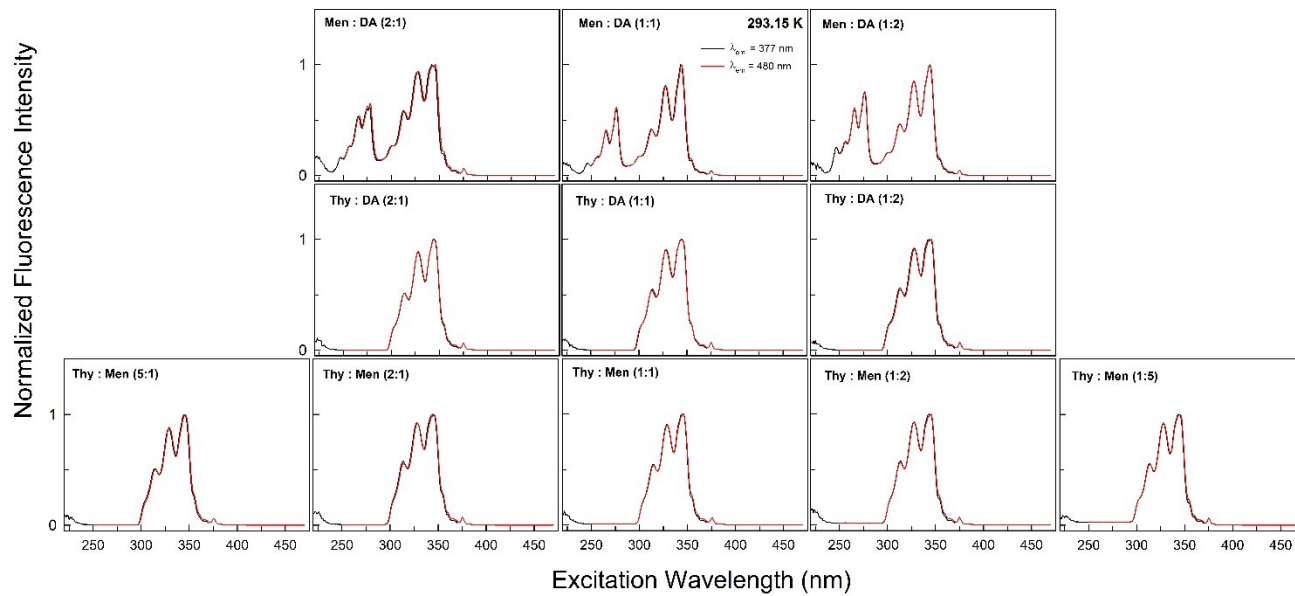

**Figure S5.** Emission wavelength-dependent fluorescence excitation spectra of 1-Py(CH<sub>2</sub>)<sub>10</sub>COO(CH<sub>2</sub>)<sub>61</sub>-Py (10 μM) dissolved in the investigated DESs recorded while monitoring the emission at 377 nm and 480 nm, respectively, at 293.15 K.

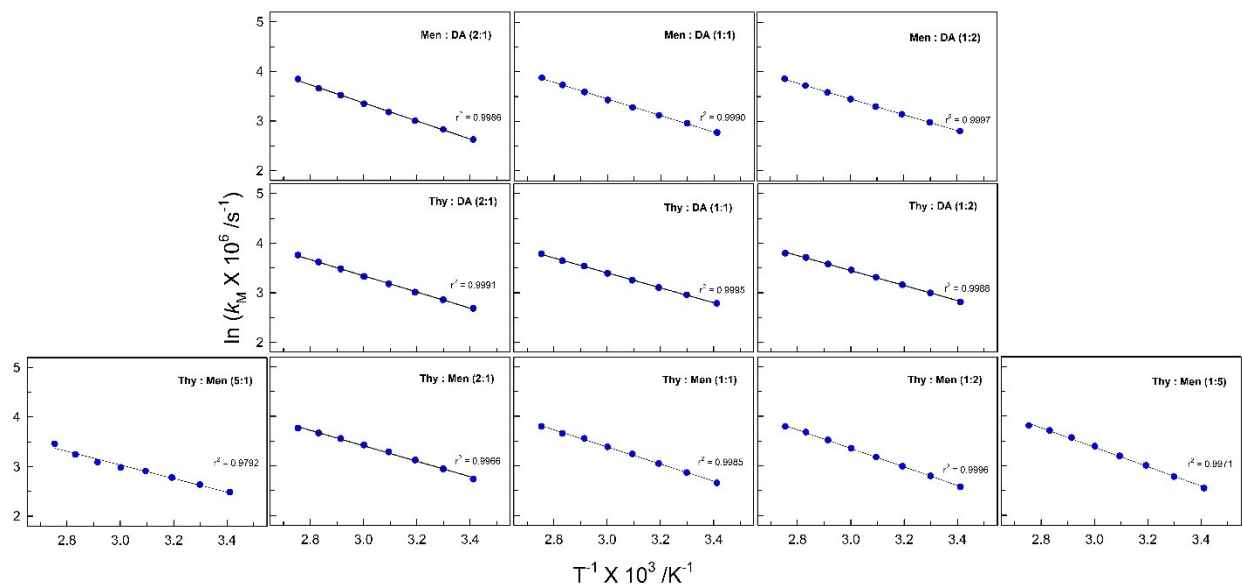

**Figure S6.** Plot of  $\ln k_M$  vs  $T^{-1}$  for 1-Py(CH<sub>2</sub>)<sub>10</sub>COO(CH<sub>2</sub>)<sub>6</sub>1-Py (10  $\mu$ M; excitation with 340 nm NanoLED) dissolved in the investigated DESs.

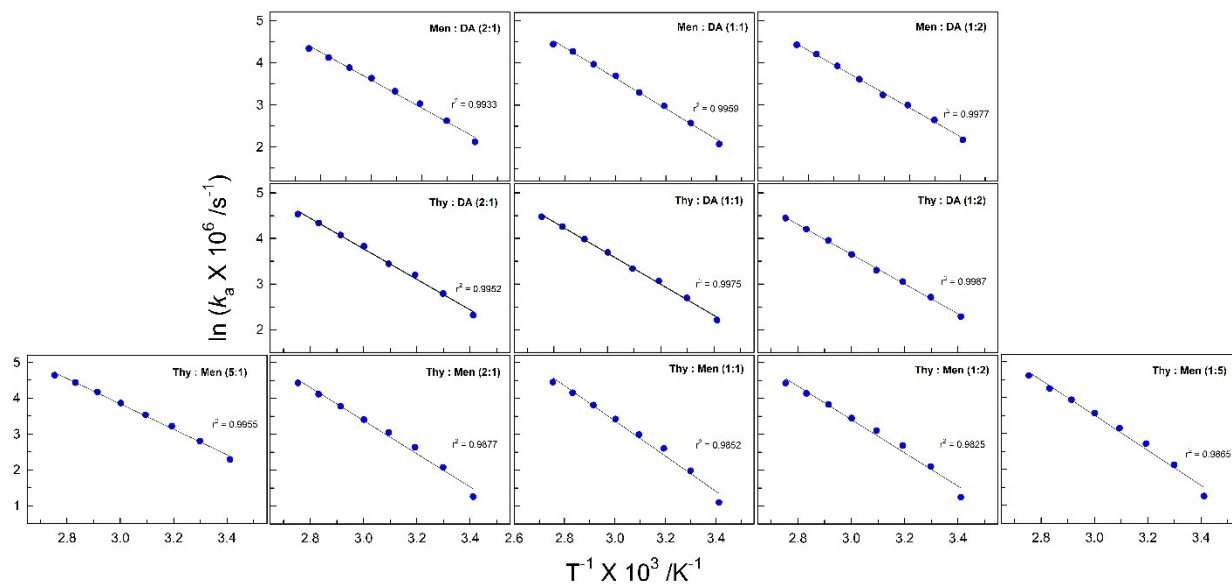

**Figure S7.** Plot of  $\ln k_a$  vs  $T^{-1}$  for 1-Py(CH<sub>2</sub>)<sub>10</sub>COO(CH<sub>2</sub>)<sub>6</sub>1-Py (10 μM; excitation with 340 nm NanoLED) dissolved in the investigated DESs.

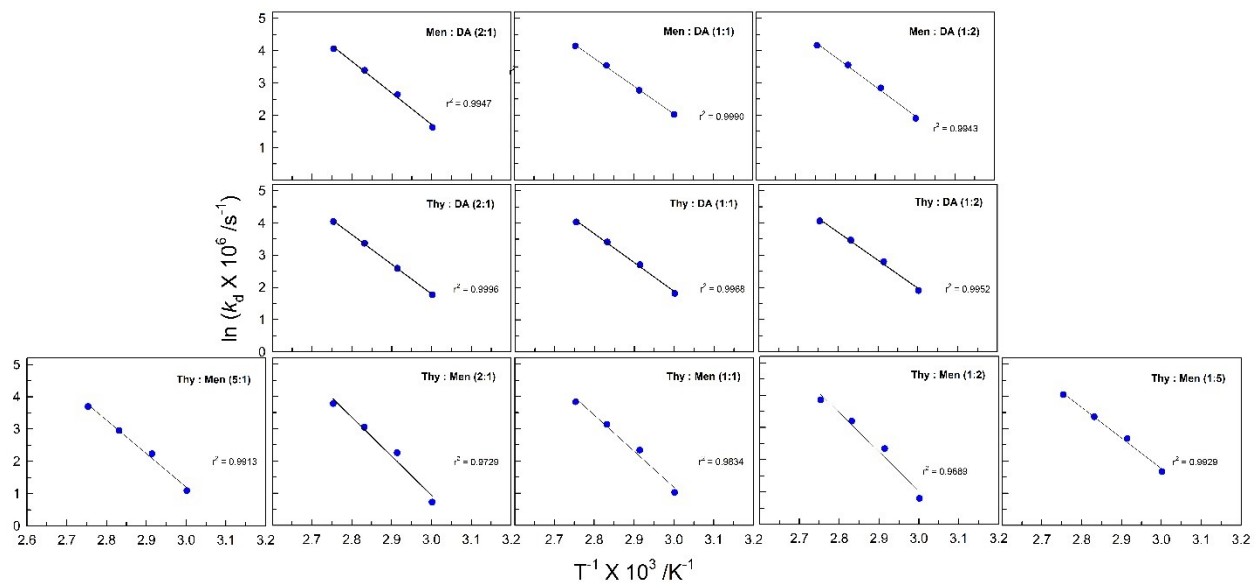

**Figure S8.** Plot of  $\ln k_d$  vs  $T^{-1}$  for 1-Py(CH<sub>2</sub>)<sub>10</sub>COO(CH<sub>2</sub>)<sub>6</sub>1-Py (10  $\mu$ M; excitation with 340 nm NanoLED) dissolved in the investigated DESs.

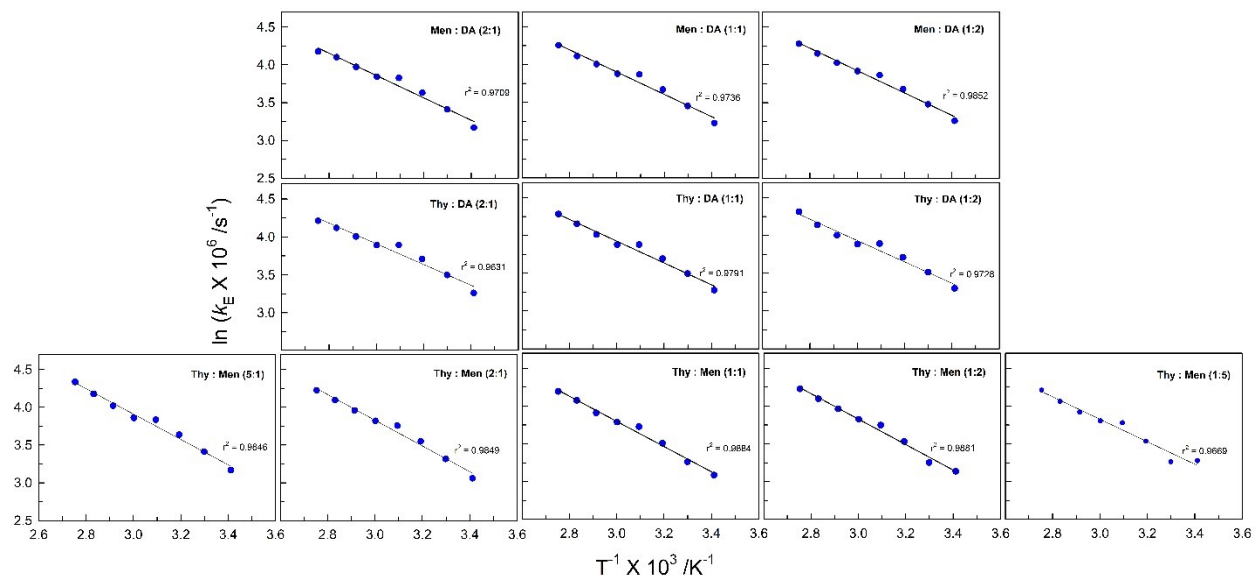

**Figure S9.** Plot of  $\ln k_E$  vs  $T^{-1}$  for 1-Py(CH<sub>2</sub>)<sub>10</sub>COO(CH<sub>2</sub>)<sub>6</sub>1-Py (10  $\mu$ M; excitation with 340 nm NanoLED) dissolved in the investigated DESs.

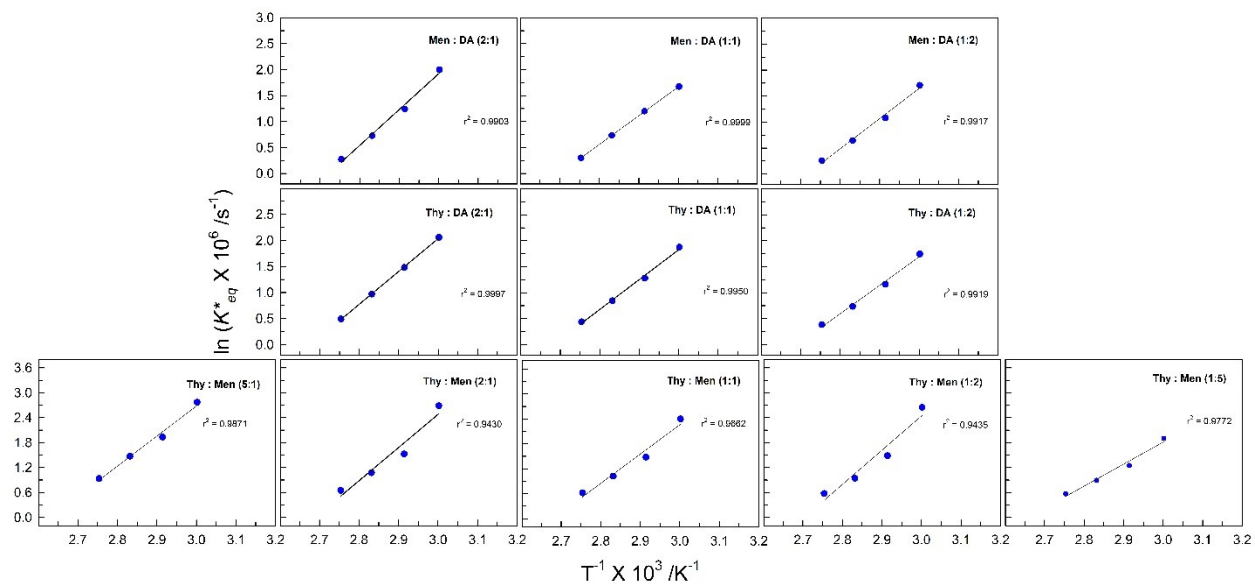

**Figure S10.** Plot of  $\ln K_{eq,a}^*$  vs  $T^{-1}$  for 1-Py(CH<sub>2</sub>)<sub>10</sub>COO(CH<sub>2</sub>)<sub>6</sub>1-Py (10  $\mu$ M; excitation with 340 nm NanoLED) dissolved in the investigated DESs.
